# Supplementary material
Source: MDPI journal article supplement (https://www.mdpi.com/2073-4441/13/16/2204)
Supplement: s1 [file s1]

### **Supplementary Materials:**

Gibson et al. Hydrogeochemistry studies in the oil sands region to investigate the role of terrain conductivity in nitrogen critical loads.

**Figure S1.** Stable isotope plots for Mariana Lakes and Jack Pine High by terrain type.

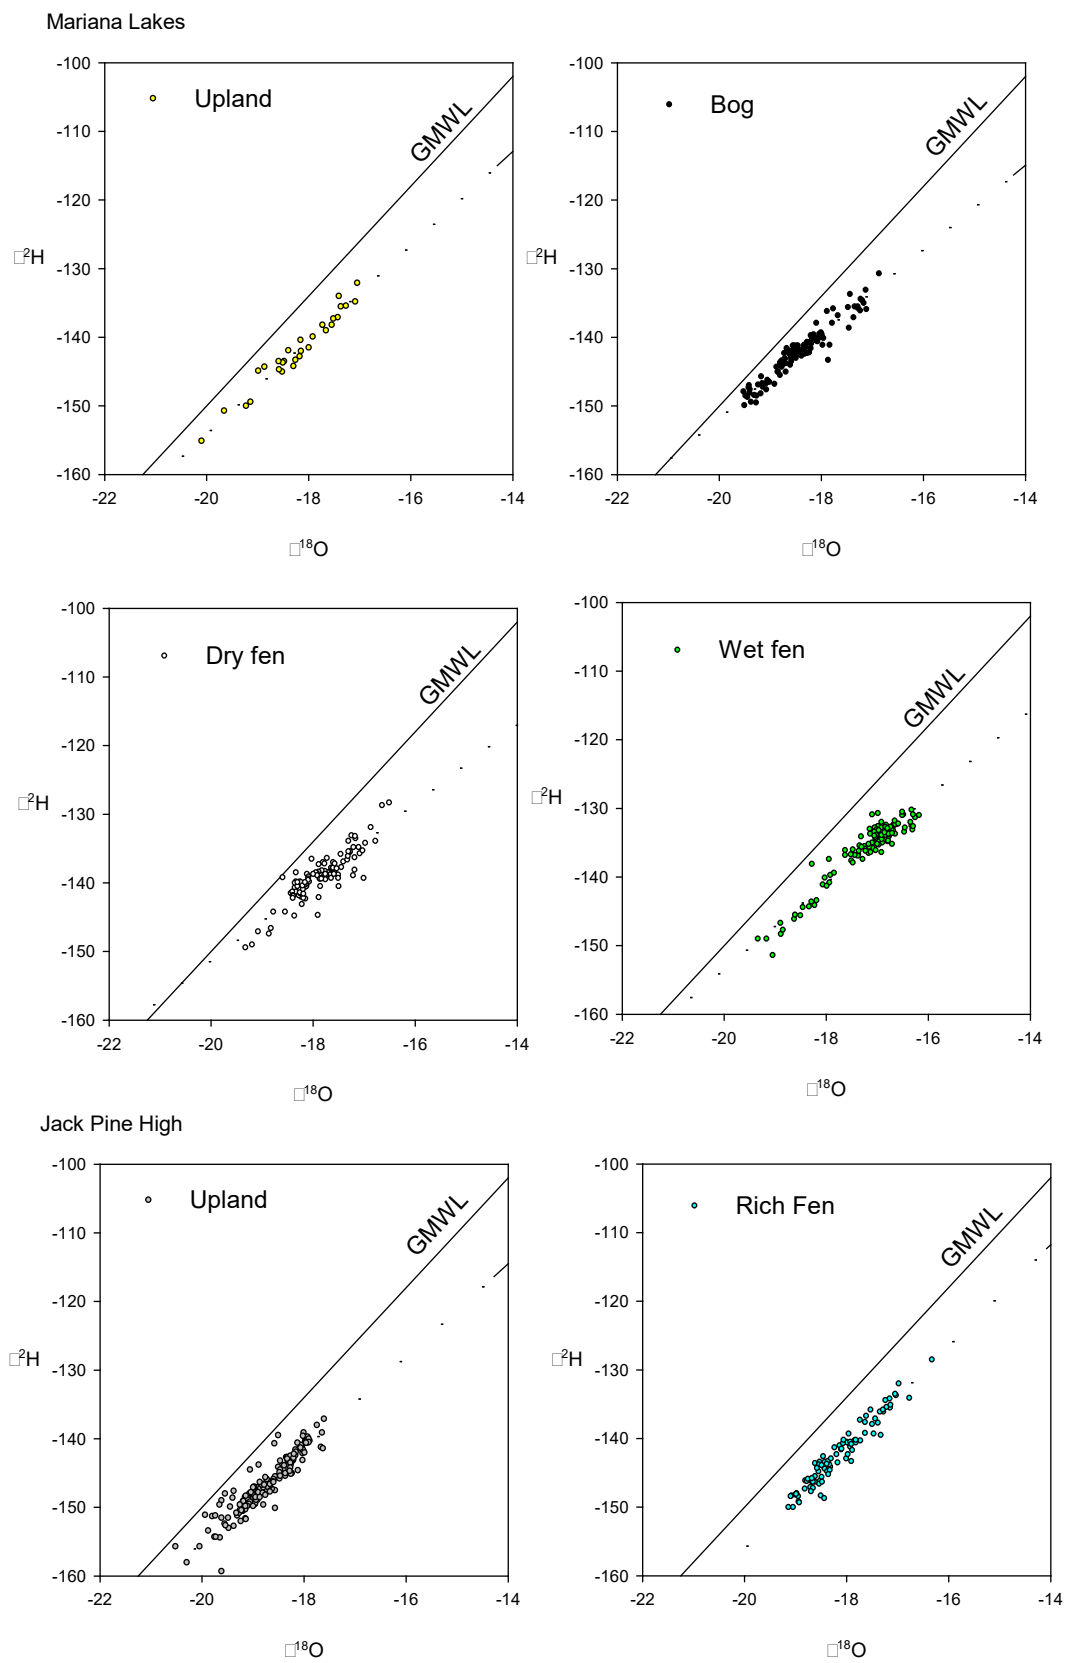

**Table S1.** Runoff potential, mean nitrate, net N flux by year and statistics.

| Terrain Unit | Type    | Well #         | Runoff Potential (mm) |            |            |            | NO <sub>3</sub><br>mg/L | Net Flux kg N/ha/yr |             |              |              | Net flux kg N/ha/yr |             |              |             |
|--------------|---------|----------------|-----------------------|------------|------------|------------|-------------------------|---------------------|-------------|--------------|--------------|---------------------|-------------|--------------|-------------|
|              |         |                | 2011                  | 2012       | 2014       | 2015       |                         | 2011                | 2012        | 2014         | 2015         | Interannual Average | Max         | Min          | Stdev       |
| Rich Fen     |         | JPH A          | -386                  | 286        | -59        | -91        | 0.06                    | -0.23               | 0.17        | -0.04        | -0.05        |                     |             |              |             |
|              |         | JPH B          | -392                  | 301        | -43        | -78        | 0.00                    | 0.00                | 0.00        | 0.00         | 0.00         |                     |             |              |             |
|              |         | JPH C          | -408                  | 303        | n.d.       | n.d.       | 1.13                    | -4.61               | 3.42        | n.d.         | n.d.         |                     |             |              |             |
|              |         | JPH D          | -428                  | 303        | n.d.       | n.d.       | 0.98                    | -4.19               | 2.97        | n.d.         | n.d.         |                     |             |              |             |
|              |         | JPH E          | -391                  | 262        | n.d.       | n.d.       | 1.50                    | -5.87               | 3.93        | n.d.         | n.d.         |                     |             |              |             |
|              |         | JPH F          | -332                  | 267        | n.d.       | n.d.       | 1.80                    | -5.98               | 4.81        | n.d.         | n.d.         |                     |             |              |             |
|              |         | JPH G          | -322                  | 174        | n.d.       | n.d.       | 0.16                    | -0.52               | 0.28        | n.d.         | n.d.         |                     |             |              |             |
|              |         | <b>Average</b> | <b>-380</b>           | <b>271</b> | <b>-51</b> | <b>-85</b> | <b>0.80</b>             | <b>-3.06</b>        | <b>2.23</b> | <b>-0.02</b> | <b>-0.03</b> | <b>-0.22</b>        | <b>2.23</b> | <b>-3.06</b> | <b>2.17</b> |
| Poor Fen     | Wet Fen | ML A           | -245                  | 77         | -31        | n.d.       | 0.44                    | -1.08               | 0.34        | -0.14        | n.d.         |                     |             |              |             |
|              |         | ML D           | -164                  | -2         | -31        | -3         | 0.42                    | -0.69               | -0.01       | -0.13        | -0.01        |                     |             |              |             |
|              |         | ML E           | -169                  | 69         | -29        | -12        | 0.00                    | 0.00                | 0.00        | 0.00         | 0.00         |                     |             |              |             |
|              |         | ML N           | -218                  | 74         | -31        | -16        | 0.20                    | -0.44               | 0.15        | -0.06        | -0.03        |                     |             |              |             |
|              |         | ML Q           | -267                  | 68         | -25        | -70        | 0.18                    | -0.48               | 0.12        | -0.05        | -0.13        |                     |             |              |             |
|              |         | ML R           | -217                  | 75         | -30        | 4          | 0.08                    | -0.17               | 0.06        | -0.02        | 0.00         |                     |             |              |             |
|              |         | <b>Average</b> | <b>-213</b>           | <b>60</b>  | <b>-30</b> | <b>-19</b> | <b>0.22</b>             | <b>-0.48</b>        | <b>0.11</b> | <b>-0.07</b> | <b>-0.03</b> | <b>-0.12</b>        | <b>0.11</b> | <b>-0.48</b> | <b>0.25</b> |
|              | Dry Fen | ML B           | -59                   | 78         | -24        | -116       | 4.88                    | -2.88               | 3.81        | -1.17        | -5.66        |                     |             |              |             |
|              |         | ML S           | -221                  | 83         | -36        | 1          | 0.50                    | -1.11               | 0.42        | -0.18        | 0.01         |                     |             |              |             |
|              |         | ML T           | -287                  | 26         | -67        | n.d.       | 0.74                    | -2.12               | 0.19        | -0.50        | n.d.         |                     |             |              |             |
|              |         | ML U           | -222                  | 81         | 1          | n.d.       | 0.00                    | 0.00                | 0.00        | 0.00         | n.d.         |                     |             |              |             |
|              |         | <b>Average</b> | <b>-197</b>           | <b>67</b>  | <b>-32</b> | <b>-58</b> | <b>1.53</b>             | <b>-1.53</b>        | <b>1.11</b> | <b>-0.46</b> | <b>-2.83</b> | <b>-0.93</b>        | <b>1.11</b> | <b>-2.83</b> | <b>1.66</b> |
| Bog          |         | ML C           | -196                  | 78         | -23        | n.d.       | 2.88                    | -5.64               | 2.25        | -0.66        | n.d.         |                     |             |              |             |
|              |         | ML F           | -286                  | 65         | -72        | -32        | 0.10                    | -0.29               | 0.07        | -0.07        | -0.03        |                     |             |              |             |
|              |         | ML M           | -248                  | 43         | -68        | 2          | 0.50                    | -1.24               | 0.22        | -0.34        | 0.01         |                     |             |              |             |
|              |         | ML O           | -284                  | 59         | -68        | -41        | 1.40                    | -3.98               | 0.83        | -0.95        | -0.57        |                     |             |              |             |
|              |         | ML P           | -290                  | 64         | -76        | -41        | 0.56                    | -1.62               | 0.36        | -0.43        | -0.23        |                     |             |              |             |
|              |         | ML V           | -289                  | 48         | n.d.       | n.d.       | 1.08                    | -3.12               | 0.52        | n.d.         | n.d.         |                     |             |              |             |
|              |         | <b>Average</b> | <b>-266</b>           | <b>60</b>  | <b>-61</b> | <b>-28</b> | <b>1.09</b>             | <b>-2.65</b>        | <b>0.71</b> | <b>-0.49</b> | <b>-0.21</b> | <b>-0.66</b>        | <b>0.71</b> | <b>-2.65</b> | <b>1.42</b> |

**Table S2.** Geochemical inventory of wells and piezometers by terrain unit. Depth categories include water table wells (WT), shallow (S), moderate (M), and deep (D) piezometers.

| Site     | Landscape | Depth   | No. Obs. | Temp. C | pH -- | Eh mV  | Cond. uS/cm | Alk.* mg/L | DIC mg/L | DOC mg/L | NO <sub>3</sub> mg/L | DON mg/L | NH <sub>4</sub> mg/L | PO <sub>4</sub> mg/L | SO <sub>4</sub> mg/L | Fl mg/L | Cl mg/L | Ca mg/L | Mg mg/L | Na mg/L | K mg/L  | δ <sup>2</sup> H ‰ | δ <sup>18</sup> O ‰ | δ <sup>13</sup> C ‰ | δ <sup>15</sup> N <sub>PM</sub> ‰ | δ <sup>13</sup> C <sub>PM</sub> ‰ |        |
|----------|-----------|---------|----------|---------|-------|--------|-------------|------------|----------|----------|----------------------|----------|----------------------|----------------------|----------------------|---------|---------|---------|---------|---------|---------|--------------------|---------------------|---------------------|-----------------------------------|-----------------------------------|--------|
| JPH      | Rich fen  | WT      | 48       | 13.4    | 5.81  | 67.0   | 74          | 17.1       | 70.10    | 30.06    | 0.82                 | 1.08     | 0.18                 | 0.10                 | 5.57                 | 0.02    | 4.17    | 7.38    | 1.93    | 2.39    | 0.75    | -138.08            | -17.68              | -18.49              | 1.42                              | -28.45                            |        |
|          |           | S       | 21       | 11.1    | 5.98  | -122.1 | 74          | 28.8       | 107.38   | 31.69    | 1.49                 | 1.11     | 0.10                 | 0.31                 | 7.26                 | 0.02    | 4.76    | 7.38    | 1.65    | 2.19    | 0.19    | -143.20            | -18.22              | -18.09              | 0.90                              | -28.05                            |        |
|          |           | M       | 21       | 9.4     | 6.24  | -134.4 | 87          | 39.7       | 128.93   | 16.96    | 2.21                 | 0.72     | 0.18                 | 0.68                 | 0.72                 | 0.04    | 1.02    | 6.98    | 1.41    | 1.74    | 0.37    | -141.62            | -18.08              | -17.32              | ---                               | -28.76                            |        |
|          |           | D       | 21       | 9.3     | 6.92  | -106.3 | 203         | 93.7       | 233.55   | 8.75     | 0.82                 | 0.40     | 0.14                 | 0.58                 | 0.95                 | 0.05    | 0.22    | 26.05   | 5.09    | 2.51    | 0.68    | -146.52            | -18.66              | -13.98              | ---                               | -27.08                            |        |
|          |           | Average |          | 10.8    | 6.24  | -74.0  | 109         | 44.8       | 134.99   | 21.86    | 1.34                 | 0.83     | 0.15                 | 0.42                 | 3.62                 | 0.03    | 2.54    | 11.94   | 2.52    | 2.21    | 0.50    | -142.35            | -18.16              | -16.97              | 1.16                              | -28.08                            |        |
|          | Upland    | S       | 60       | 12.9    | 5.96  | 143.1  | 41          | 10.8       | 35.94    | 2.14     | 1.16                 | 0.57     | 0.02                 | 0.12                 | 8.28                 | 0.01    | 0.32    | 4.21    | 1.01    | 0.85    | 0.52    | -149.45            | -19.10              | -17.86              | ---                               | -28.67                            |        |
|          |           | M       | 56       | 11.2    | 5.86  | 137.9  | 44          | 15.8       | 56.21    | 1.78     | 1.38                 | 0.16     | 0.01                 | 0.18                 | 7.82                 | 0.01    | 0.20    | 3.87    | 0.80    | 1.25    | 0.59    | -147.90            | -18.95              | -19.41              | ---                               | -28.97                            |        |
|          |           | D       | 56       | 10.1    | 6.19  | -26.7  | 93          | 44.2       | 168.23   | 17.57    | 2.62                 | 0.59     | 0.14                 | 0.59                 | 2.49                 | 0.03    | 0.20    | 8.84    | 2.28    | 2.53    | 0.55    | -142.74            | -18.26              | -13.99              | -6.65                             | -31.27                            |        |
|          |           | Average |          | 11.4    | 6.00  | 84.8   | 59          | 23.6       | 86.79    | 7.16     | 1.72                 | 0.44     | 0.06                 | 0.30                 | 6.20                 | 0.02    | 0.24    | 5.64    | 1.36    | 1.54    | 0.55    | -146.70            | -18.77              | -17.09              | -6.65                             | -29.64                            |        |
|          | ML        | Bog     | WT       | 44      | 15.0  | 4.28   | 176.9       | 29         | 5.6      | 114.09   | 67.15                | 1.03     | 1.58                 | 0.07                 | 0.27                 | 0.26    | 0.01    | 0.36    | 1.33    | 0.47    | 0.83    | 0.81               | -137.77             | -17.80              | -14.60                            | -1.47                             | -29.31 |
|          |           |         | S        | 30      | 12.3  | 4.89   | 138.2       | 47         | 9.9      | 242.53   | 58.94                | 0.66     | 5.81                 | 1.89                 | 0.48                 | 0.31    | 0.01    | 0.54    | 4.05    | 0.60    | 1.07    | 0.55               | -141.26             | -18.27              | -1.92                             | -3.03                             | -28.99 |
|          |           |         | M        | 30      | 12.4  | 5.58   | 98.1        | 126        | 51.5     | 319.30   | 54.08                | 0.06     | 11.98                | 9.47                 | 1.12                 | 0.22    | 0.02    | 0.53    | 9.74    | 1.90    | 0.98    | 0.81               | -144.03             | -18.77              | 4.22                              | -4.92                             | -34.36 |
|          |           |         | D        | 17      | 8.3   | 7.05   | 98.0        | 576        | 369.8    | 872.25   | 110.63               | 0.10     | 5.82                 | 23.19                | 0.36                 | 0.18    | 0.10    | 0.55    | 117.52  | 34.11   | 2.70    | 1.61               | -142.54             | -18.52              | 6.84                              | -0.65                             | -26.40 |
|          |           |         | Average  |         | 12.0  | 5.45   | 127.8       | 194        | 109.2    | 387.04   | 72.70                | 0.46     | 6.30                 | 8.65                 | 0.56                 | 0.24    | 0.03    | 0.50    | 33.16   | 9.27    | 1.39    | 0.94               | -141.40             | -18.34              | -1.36                             | -2.52                             | -29.77 |
|          |           | Dry Fen | WT       | 36      | 15.3  | 4.43   | 164.0       | 26         | 1.8      | 145.61   | 49.57                | 1.35     | 0.77                 | 0.04                 | 0.11                 | 0.09    | 0.02    | 0.20    | 1.49    | 0.43    | 0.79    | 0.54               | -137.47             | -17.69              | -11.37                            | -1.25                             | -29.58 |
| S        |           |         | 43       | 11.9    | 5.18  | 142.6  | 90          | 21.5       | 387.05   | 77.26    | 0.21                 | 12.00    | 5.34                 | 0.70                 | 0.11                 | 0.02    | 0.52    | 7.32    | 1.52    | 1.25    | 0.67    | -137.76            | -17.73              | 1.47                | -6.96                             | -27.77                            |        |
| M        |           |         | 34       | 11.5    | 5.67  | 146.8  | 199         | 71.3       | 502.76   | 67.75    | 0.92                 | 22.31    | 12.61                | 1.56                 | 0.07                 | 0.01    | 0.24    | 14.95   | 3.11    | 0.74    | 0.51    | -139.06            | -17.91              | 7.20                | -4.47                             | -29.61                            |        |
| D        |           |         | 25       | 12.2    | 7.94  | 113.7  | 2025        | 606.9      | 1058.72  | 56.72    | 0.18                 | 21.20    | 24.47                | 0.15                 | 0.53                 | 0.06    | 0.64    | 142.46  | 31.33   | 3.04    | 2.59    | -139.13            | -17.69              | 9.92                | -1.84                             | -30.68                            |        |
| Average  |           |         |          | 12.7    | 5.81  | 141.8  | 585         | 175.4      | 523.54   | 62.82    | 0.66                 | 14.07    | 10.62                | 0.63                 | 0.20                 | 0.03    | 0.40    | 41.56   | 9.10    | 1.45    | 1.08    | -138.36            | -17.76              | 1.80                | -3.63                             | -29.41                            |        |
| Wet Fen  |           | WT      | 51       | 16.0    | 4.45  | 157.8  | 23          | 2.3        | 149.28   | 42.84    | 0.29                 | 1.21     | 0.10                 | 0.09                 | 0.08                 | 0.01    | 0.42    | 1.22    | 0.37    | 0.86    | 0.86    | -136.31            | -17.42              | -6.50               | -1.30                             | -30.78                            |        |
|          |           | S       | 34       | 12.8    | 4.95  | 109.1  | 61          | 15.7       | 343.73   | 64.96    | 0.21                 | 6.27     | 3.30                 | 0.69                 | 0.08                 | 0.03    | 0.25    | 5.16    | 1.13    | 0.88    | 0.53    | -134.28            | -17.00              | 3.42                | -5.98                             | -28.60                            |        |
|          |           | M       | 35       | 14.1    | 5.73  | 131.0  | 94          | 43.2       | 330.57   | 62.70    | 1.18                 | 5.22     | 5.11                 | 2.17                 | 0.55                 | 0.03    | 1.28    | 7.77    | 1.85    | 2.07    | 0.95    | -134.62            | -16.95              | 7.23                | -2.31                             | -27.45                            |        |
|          |           | D       | 26       | 11.5    | 6.65  | -45.5  | 421         | 199.6      | 492.24   | 44.57    | 0.00                 | 5.96     | 2.62                 | 0.84                 | 0.17                 | 0.04    | 0.29    | 23.64   | 7.96    | 2.52    | 1.54    | -132.80            | -16.66              | 4.29                | -1.15                             | -26.15                            |        |
|          |           | Average |          | 13.6    | 5.45  | 88.1   | 150         | 65.2       | 328.95   | 53.77    | 0.42                 | 4.66     | 2.78                 | 0.95                 | 0.22                 | 0.03    | 0.56    | 9.45    | 2.83    | 1.58    | 0.97    | -134.50            | -17.01              | 2.11                | -2.69                             | -28.25                            |        |
| Edge Fen | S         | 23      | 16.3     | 6.30    | 29.7  | 245    | 68.9        | 426.53     | 26.23    | 1.01     | 1.98                 | 0.01     | 0.50                 | 0.36                 | 0.14                 | 0.39    | 22.25   | 7.74    | 4.33    | 0.30    | -139.77 | -17.92             | -14.68              | 2.10                | -26.29                            |                                   |        |
|          | M         | 24      | 19.7     | 8.75    | 27.0  | 355    | 209.7       | 557.61     | 30.77    | 1.07     | 3.69                 | ---      | ---                  | 0.66                 | 0.37                 | 0.75    | 201.58  | 24.13   | 36.11   | 1.83    | -139.73 | -18.01             | -16.21              | ---                 | -26.49                            |                                   |        |
|          | Average   |         | 18.0     | 7.52    | 28.3  | 300    | 139.3       | 492.07     | 28.50    | 1.04     | 2.83                 | 0.01     | 0.50                 | 0.51                 | 0.25                 | 0.57    | 111.92  | 15.93   | 20.22   | 1.06    | -139.75 | -17.97             | -15.45              | 2.10                | -26.39                            |                                   |        |
| Upland   | S         | 28      | 12.3     | 7.06    | 76.0  | 176    | 19.1        | 100.89     | 6.85     | 0.48     | 3.37                 | 0.22     | 0.19                 | 3.12                 | 0.06                 | 0.78    | 5.52    | 1.22    | 1.60    | 0.49    | -142.41 | -18.31             | -17.57              | -1.00               | -24.97                            |                                   |        |
|          | M         | 28      |          | 10.75   | ---   | ---    | ---         | 57.56      | 20.20    | 1.70     | 10.20                | 0.42     | 0.10                 | 1.49                 | 0.07                 | 1.95    | 200.47  | 28.97   | 22.92   | 4.60    | -139.90 | -17.90             | -20.86              | ---                 | ---                               |                                   |        |
|          | Average   |         | 12.3     | 8.91    | 76.0  | 176    | 19.1        | 79.23      | 13.53    | 1.09     | 6.78                 | 0.32     | 0.14                 | 2.31                 | 0.06                 | 1.36    | 102.99  | 15.09   | 12.26   | 2.55    | -141.16 | -18.11             | -19.21              | -1.00               | -24.97                            |                                   |        |

\* mg/L CaCO<sub>3</sub>; S - 0.8 to 3.0 m-depth, M - 2.1 to 4.7m-depth, D - 4.6 to 7.8 m-depth.

---

**Table S3.** Mariana Lakes nitrogen inventory including NH<sub>4</sub> and DON.

| (a) Linear regressions       |                | Bog   | dry fen | wet fen | all data |
|------------------------------|----------------|-------|---------|---------|----------|
| NH <sub>4</sub> versus depth | slope          | 3.55  | 2.31    | 2.05    | 2.42     |
|                              | intercept      | -1.77 | 1.21    | -0.73   | -0.78    |
|                              | r <sup>2</sup> | 0.81  | 0.58    | 0.75    | 0.47     |
| DON versus depth             | slope          | 1.65  | 4.24    | 1.55    | 2.59     |
|                              | intercept      | 2 .59 | 2.49    | 1.53    | 2.13     |
|                              | r <sup>2</sup> | 0.30  | 0.54    | 0.26    | 0.31     |

  

| (b) Inventories<br>kg N/ha |  | Bog | dry fen | wet fen | all data |
|----------------------------|--|-----|---------|---------|----------|
| <u>NH<sub>4</sub>-N</u>    |  |     |         |         |          |
| 0 to 3 m                   |  | 65  | 91      | 45      | 57       |
| 3 to 5 m                   |  | 174 | 146     | 106     | 125      |
| 5 to 7 m                   |  | 273 | 211     | 162     | 192      |
| Total                      |  | 512 | 448     | 313     | 374      |

  

|              |  |     |      |     |     |
|--------------|--|-----|------|-----|-----|
| <u>DON-N</u> |  |     |      |     |     |
| 0 to 3 m     |  | 82  | 219  | 84  | 139 |
| 3 to 5 m     |  | 165 | 350  | 139 | 225 |
| 5 to 7 m     |  | 225 | 501  | 241 | 225 |
| Total        |  | 472 | 1070 | 464 | 589 |

  

|                           |  |     |      |     |     |
|---------------------------|--|-----|------|-----|-----|
| <u>NH<sub>4</sub>+DON</u> |  |     |      |     |     |
| 0 to 3 m                  |  | 147 | 310  | 129 | 196 |
| 3 to 5 m                  |  | 339 | 496  | 245 | 350 |
| 5 to 7 m                  |  | 498 | 712  | 403 | 417 |
| Total                     |  | 984 | 1518 | 777 | 963 |
